# Supplementary material
Source: publisher site journal article supplement (https://www.dovepress.com/article/533871)
Supplement: Supplementary file 1 [file 533871%20Revised%20Supplementary%20Materials.docx]

**Supplementary Material 1: Supplementary Methods**

The five national cohorts included in this study were Cohorts 1, 4, 6, 7, and 9 from the “13th Five-Year Plan” program.

Cohort 1 was established during China’s “11th Five-Year” national research initiative and was designed to evaluate the applicability of the D4T+3TC+NVP and AZT+3TC+NVP regimens in the Chinese population.

Cohort 4 aimed to assess the therapeutic efficacy of the combination regimen of tenofovir disoproxil fumarate, lamivudine, and efavirenz (TDF+3TC+EFV) in Chinese individuals. This cohort primarily enrolled patients with chronic HIV-1 infection and baseline CD4 counts <500 cells/mm³, all of whom received TDF+3TC+EFV.

Cohort 6 enrolled HIV-1–infected individuals from AIDS prevention and treatment demonstration zones and high-prevalence regions such as Yunnan and Guangxi provinces. The objective was to evaluate the effectiveness of TDF+3TC+EFV in settings with high HIV transmission rates.

Cohort 7 was designed to investigate the long-term risk of osteoporosis associated with TDF-based therapy in Chinese people living with HIV. All participants received the TDF+3TC+EFV regimen and were randomly assigned to either receive or not receive vitamin D₃ supplementation.

Cohort 9 focused on evaluating the safety and efficacy of a reduced-dose efavirenz regimen (600 mg to 400 mg) within the standard TDF+3TC+EFV combination.

**Supplementary Table 1.** **Fully adjusted Cox regression model including age, sex, baseline CD4+ T cell counts and baseline viral load.**

|  | Adjusted HR [95% CI] | P value |
| --- | --- | --- |
| Virological suppression | 1.0 (reference) | - |
| Virological Blip | 0.5 [0.4 – 1.2] | 0.151 |
| LLV | 0.9 [0.3 – 1.9] | 0.474 |
| Age | 1.0 [1.0 – 1.0] | 0.563 |
| Male | 0.9 [0.4 – 2.2] | 0.827 |
| Baseline CD4+ T cell counts | 1.0 [1.0 – 1.0] | 0.842 |
| Baseline viral load | 0.9 [0.6 – 1.5] | 0.808 |

A total of 1,260 patients were included, and 37 virological failure events occurred.

**Supplementary Table 2.** **Baseline characteristics of LLV patients with (N=17) and without (N=149) successful drug resistance mutation sequencing.**

| **Groups** | | **Not sequenced** | **Sequenced** | ***p*** |
| --- | --- | --- | --- | --- |
| N | | 149 | 17 |  |
| Gender (%) | |  |  |  |
|  | Female | 20 (13.4) | 4 (23.5) | 0.448 |
|  | Male | 129 (86.6) | 13 (76.5) |  |
| Age (years, median [IQR]) | | 33 [27, 45] | 41 [31, 47] | 0.209 |
| Calendar year of initiation ART (%) | |  |  |  |
|  | After 2012 | 108 (72.5) | 11 (64.7) | 0.696 |
|  | Before 2012 | 41 (27.5) | 6 (35.3) |  |
| Calendar year of infection (%) | |  |  |  |
|  | After 2012 | 85 (57.0) | 8 (47.1) | 0.597 |
|  | Before 2012 | 64 (43.0) | 9 (52.9) |  |
| Route of HIV transmission (%) | |  |  |  |
|  | Heterosexual | 51 (34.2) | 6 (35.3) | 0.002 |
|  | Homosexual | 78 (52.3) | 3 (17.6) |  |
|  | Blood product | 3 (2.0) | 2 (11.8) |  |
|  | Other | 17 (11.4) | 6 (35.3) |  |
| Baseline CD4+ T count (cells/ul, median [IQR]) | | 221 [130, 309] | 214 [122, 240] | 0.485 |
| Baseline CD4/CD8 ratio (median, [IQR]) | | 0.22 [0.13, 0.32] | 0.21 [0.09, 0.36] | 0.784 |
| Baseline viral load (log10 copies/ml, median [IQR]) | | 4.92 [4.50, 5.39] | 4.98 [4.56, 5.31] | 0.768 |
| RPR (%) | |  |  |  |
|  | Negative | 82 (55.0) | 11 (64.7) | 0.595 |
|  | Positive | 34 (22.8) | 4 (23.5) |  |
|  | Untested | 33 (22.1) | 2 (11.8) |  |
| HBs-Ag (%) | |  |  |  |
|  | Negative | 132 (88.6) | 15 (88.2) | 0.835 |
|  | Positive | 12 (8.1) | 1 (5.9) |  |
|  | Untested | 5 (3.4) | 1 (5.9) |  |
| HCV-Ab (%) | |  |  |  |
|  | Negative | 138 (92.6) | 15 (88.2) | 0.808 |
|  | Positive | 6 (4.0) | 1 (5.9) |  |
|  | Untested | 5 (3.4) | 1 (5.9) |  |
| Baseline ART regimens (%) | |  |  |  |
|  | 2NRTI+1NNRTI | 108 (82.4) | 14 (100.0) | 0.404 |
|  | 2NRTI+1PI | 8 (6.1) | 0 (0.0) |  |
|  | 2NRTI+1INSTI | 11 (8.4) | 0 (0.0) |  |
|  | Other | 4 (3.1) | 0 (0.0) |  |

**Abbreviation:** VS, virological suppression; VB, virological blip; LLV, low-level viremia; NRTI, nucleoside reverse transcriptase inhibitor; NNRTI, non-NRTI; PI, protease inhibitor; INSTI, integrase inhibitor.
